# Supplementary material for: Similarity in Shape Dictates Signature Intrinsic Dynamics Despite No Functional Conservation in TIM Barrel Enzymes
Source: PubMed Central journal article supplement (PMC4807811; doi:10.1371/journal.pcbi.1004834), 2016-03-25
Supplement: pcbi.1004834.s010.pdf [file pcbi.1004834.s010.pdf]

Supplementary Table 1 – Summary of the five main TBF structures studied.

| Enzyme                                  | CATH ID<br>Superfamily name                                | PDB ID/Chain, Domain (Sequence index) | E.C.               | Catalytic residues                                     | Substrate and/or metal-ion binding residues                                             | Phosphate binding? <sup>1</sup>   |
|-----------------------------------------|------------------------------------------------------------|---------------------------------------|--------------------|--------------------------------------------------------|-----------------------------------------------------------------------------------------|-----------------------------------|
| Triosephosphate isomerase               | 3.20.20.70<br>Aldolase Class I                             | 1N55/Chain A, 00 (2-250)              | 5.3.1.1            | From [7]: N11, K13, H95, E167                          | From 1NEY[63]: A171, I172, G212, L232                                                   | From [7]: G173, S213, G234, G235  |
| Chitinase B                             | 3.20.20.80<br>Glycosidase                                  | 1E15/Chain A01 (3-290, 381-448)       | 3.2.1.14, 3.2.1.96 | From [64]: Y214, D140, D142, E144                      | From 1E6N[65]: Y10, F51, W97, Y98, Y145, F190, F191, M212, D215, W220, E221, L265, W403 | No                                |
| Methylaspartate ammonia lyase           | 3.20.20.120<br>Enolase                                     | 1KKO/Chain A02 (165-411)              | 4.3.1.2, 4.2.113   | H194, K331                                             | From [66]: Q329, C361, T360, Q172, L384 / Mg <sup>2+</sup> : D238, E273, D307           | No                                |
| Transaldolase B                         | 3.20.20.70<br>Aldolase Class I                             | 3CWN/ Chain A00 (2-317)               | 2.2.1.2            | From [67]: K132, E96 via water, T156 via water and D17 | N35, N154, S176, F178, S226                                                             | From [67] & [9]: R228, S226, R181 |
| Glycerophosphodiester phosphodiesterase | 3.20.20.190<br>Phosphatidylinositol (PI) phosphodiesterase | 3CH0/ Chain A00 (0-271)               | 3.1.4.46           | From [68]: H13, H55 <sup>2</sup>                       | H13, R14, E40, D42, H55, E135, K137 / Ca <sup>2+</sup> : E40, D42, E135                 | H13, R14, H55 and K137            |

<sup>1</sup> This refers to sites that bind to phosphate moieties of the substrate, and may or may not have the standard phosphate-binding motif as defined in Nagano (2002).

<sup>2</sup> Reaction involves the phosphate moiety of the substrate, so both the catalytic residues and phosphate-binding residues are the same.
