# Supplementary material for: Similarity in Shape Dictates Signature Intrinsic Dynamics Despite No Functional Conservation in TIM Barrel Enzymes
Source: PLOS journal article supplement (doi:10.1371/journal.pcbi.1004834), 2016-03-25
Supplement: S9 (10.1371/journal.pcbi.1004834.s009) [file journal.pcbi.1004834.s009]

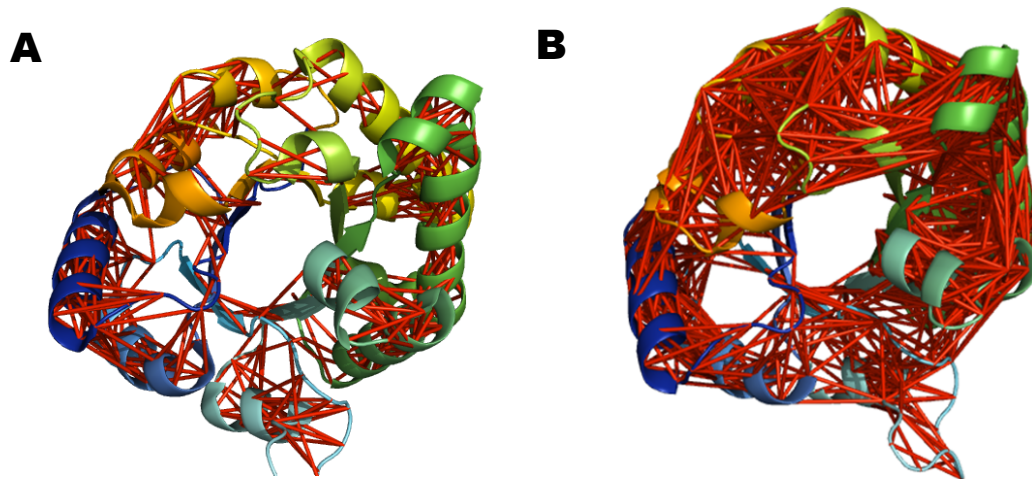

Supplementary Figure 9 – Distribution of distant significant distant correlations in the monomeric form (A) and chain A of the dimeric form (B) of 1N55. We have the top views from the perspective of the C-terminal end, where the respective structures are displayed with the cartoon representation in rainbow (N-terminal in blue, C-terminal in red), and sticks between each pair of residue positions with significant correlations at least 8 Å apart (cf. Methods). The red sticks indicate positive correlations above the score threshold at the 95<sup>th</sup> percentile rank of the absolute values of the correlations. The oligomeric interface spans the first three  $\beta$ - $\alpha$  secondary structure units (blue to cyan).
